1     **Infectious myonecrosis virus (IMNV) and decapod iridescent**  
2                     **virus 1 (DIV1) detected in *Penaeus monodon***  
3                     **from the Indian Ocean**

4  
5             Jiraporn Srisala<sup>1</sup>, Piyachat Sanguanrut<sup>1</sup>, Saensook Laiphrom<sup>2</sup>,  
6     Jittima Siritattano<sup>2</sup>, Juthatip Khudet<sup>2</sup>, Dararat Thaiue<sup>1</sup>, Sorawit Powtongsook<sup>2</sup>,  
7             Timothy W. Flegel<sup>3,4</sup>, Kallaya Sritunyalucksana<sup>1,#</sup>

8  
9     <sup>1</sup> Aquatic Animal Health Research Team, Integrative Aquaculture Biotechnology Research  
10    Group, National Center for Genetic Engineering and Biotechnology (BIOTEC), National  
11    Science and Technology Development Agency (NSTDA), Yothi office, Rama VI Rd.,  
12    Bangkok, 10400, Thailand

13    <sup>2</sup> Shrimp Genetic Improvement Center, Integrative Aquaculture Biotechnology Research  
14    Group, 333 Moo 5, Phumriang district, Chaiya, Surat Thani, 84110, Thailand

15    <sup>3</sup> National Center for Genetic Engineering and Biotechnology (BIOTEC), National Science  
16    and Technology Development Agency (NSTDA), Klong Luang, Pathumthani, 12120,  
17    Thailand

18    <sup>4</sup> Center of Excellence for Shrimp Molecular Biology and Biotechnology (Centex Shrimp),  
19    Faculty of Science, Mahidol University, Rama VI Rd., Bangkok, 10400, Thailand

20  
21    #corresponding author

22    Email address: kallaya@biotec.or.th

23  
24  
25    **ABSTRACT**

26    Infectious myonecrosis virus (IMNV) was first discovered in the Americas in 2004 as a new  
27    lethal pathogen of cultivated whiteleg shrimp *Penaeus vannamei*, but infections were not lethal  
28    for the giant tiger shrimp *Penaeus monodon*. In 2007, it was reported in diseased *P. vannamei*  
29    cultivated in Indonesia but, until recently, not from other countries in Asia. Decapod iridescent  
30    virus (DIV1) was first reported from China in 2016 and is lethal for the crayfish *Cherax*  
31    *quadricarinatus* and *Procambarus clarkii*, for the penaeid shrimp *P. vannamei* and *P. chinensis*  
32    and for the palaemonid shrimp *Macrobrachium rosenbergii* and *Exopalaemon carinicauda*. It  
33    has not yet been reported from other Asian countries. Here we describe the occurrence of  
34    positive test results for IMNV and DIV1 using polymerase chain reaction (PCR) technology  
35    during screening of grossly normal, broodstock-size, wild *P. monodon* captured from the Indian  
36    Ocean and held in a biosecurity facility for screening. Amplicons for each virus were obtained  
37    from two widely separated targets in the relevant viral genomes listed at GenBank, and  
38    sequencing revealed 99-100% identity to the targets for each virus. Based on these results, the

39 captured specimens were destroyed. The results raised the possibility that grossly normal,  
40 captured *P. monodon* might serve as potential vehicles for introduction of IMNV and/or DIV1  
41 to shrimp hatcheries and farms. Thus, we recommend that appropriate precautions be taken to  
42 avoid this possibility.

43

## 44 INTRODUCTION

45 Infectious myonecrosis virus (IMNV) was first described from the Americas as a lethal  
46 pathogen of the whiteleg shrimp *Penaeus vannamei* (Poulos Lightner, 2006; Poulos, et al.,  
47 2006). However, it was also infectious but not lethal for *P. stylirostris* and *P. monodon* (Poulos  
48 Lightner, 2006; Poulos, et al., 2006; Tang, et al., 2005). It was subsequently introduced to  
49 Indonesia around 2006 (Senapin, et al., 2007) but has been slow to spread to other Asian  
50 countries (Sahul Hameed, et al., 2017; Senapin, et al., 2011). Decapod iridescent virus  
51 (DIV1)(Chen, et al., 2019) in *Exopalaemon carinicauda* was first described from China as  
52 *Cherax quadricarinatus* iridovirus/CQIV infectious for *C. quadricarinatus*, *Procambarus*  
53 *clarkii* and *P. vannamei* (Li, et al., 2017; Xu, et al., 2016) or as shrimp hemocyte iridescent virus  
54 (SHIV)(Qiu, et al., 2017; Qiu, et al., 2018) infectious for *P. vannamei*, *P. chinensis* and  
55 *Macrobrachium rosenbergii*. Thus, DIV1 has a wide known-host range that includes several  
56 economically important cultured species.

57

58 Infectious myonecrosis disease caused by IMNV results in gross signs of disease characterized  
59 by whitening of the skeletal muscles, especially in the abdominal region of affected shrimp  
60 (Poulos, et al., 2006). When such tissues are examined for histopathology, muscle lesions can  
61 be seen that are characterized by myonecrosis, hemocyte aggregation and the presence of  
62 basophilic, cytoplasmic inclusions (Poulos & Lightner, 2006; Poulos, et al., 2006). There are  
63 also published nested, reverse-transcriptase, polymerase chain reaction (RT-PCR) methods for  
64 its detection, even in lightly-infected specimens that may show no gross signs or histological  
65 signs of infection (Poulos & Lightner, 2006; Senapin, et al., 2007). The presence of IMNV  
66 nucleic acid (RNA) in the cytoplasm of cells in muscle lesions has been confirmed by *in situ*  
67 hybridization (ISH) assays (Poulos, et al., 2006).

68

69 Disease caused by DIV1 results in massive mortality accompanied by gross signs of disease  
70 characterized by features including an empty stomach and midgut, a pale hepatopancreas and  
71 a soft shell (Qiu, et al., 2017). Histological signs of DIV1 include pathognomonic lesions  
72 characterized by the presence of unique, lightly basophilic viral inclusions in the cytoplasm of  
73 cells of the hematopoietic tissue (HPT)(Qiu, et al., 2017). The same specimens also show severe  
74 necrosis of the lymphoid organ (LO) characterized by loss of tubule structure and the presence  
75 of basophilic, cytoplasmic inclusions including karyorrhetic and pyknotic nuclei (Sanguanrut  
76 et al., 2020). However, in lightly-infected shrimp, DIV1 may also be detected using nested PCR.  
77 The presence of DIV1-DNA in the cytoplasm of cells in these tissues has been confirmed by

78 ISH (Qiu, et al., 2017). It also reveals presence of the virus in the cytoplasm of cells of the  
79 antennal gland and of connective tissues including those of the skeletal muscles, the  
80 subcuticulum, the hepatopancreas (HP) and the anterior midgut cecum (AMC).

81

82 IMNV has posed a threat to Asian aquaculture since its introduction to Indonesia around 2006  
83 but it had not spread from there (Senapin, et al., 2011) until relatively recently (Sahul Hameed,  
84 et al., 2017). Thus, it remains a threat to other countries from which it has not yet been reported.  
85 The recent description of DIV1 from China and its pathogenicity for several crustacean species  
86 also poses a new threat to all other shrimp culturing countries from which it has not yet been  
87 reported.

88

89 In a program to establish a breeding stock from wild, captured specimens of *P. monodon* from  
90 the Indian Ocean, we participated by screening individuals from captured batches for a list of  
91 14 known viral pathogens and parasites by non-destructive polymerase chain reaction (PCR)  
92 methods while they were being held in a biosecure facility. It is important to understand that  
93 this was not an epidemiological survey. Thus, there was no geographical collection plan and  
94 shrimp were sequentially tested for each pathogen such that a positive test for any specimen at  
95 any stage of testing resulted in its destruction and in no on-going testing of its nucleic acid  
96 extracts for pathogens for which it had not yet been tested. In other words, not every shrimp  
97 collected was subjected to screening for every pathogen in the screening list. As a result, the  
98 information gained from this study cannot be used to estimate the possible prevalence of IMNV  
99 and DIV1 positive shrimp in wild populations of *P. monodon* in the Indian Ocean.

100

101 We detected IMNV and DIV1 in both batches captured in April 2018 and March 2019. Here  
102 we describe details of the methods used and results obtained. Although we carried out no  
103 bioassays using the positive specimens as a source of inoculum, our results open the possibility  
104 that grossly normal, captured *P. monodon* might serve as potential vehicles for introduction of  
105 IMNV and/or DIV1 to shrimp hatcheries and farms. Thus, we recommend that appropriate  
106 precautions be taken to avoid this possibility.

107

## 108 **MATERIALS AND METHODS**

### 109 **Shrimp specimens and sampling**

110 Thai fishermen were hired to capture broodstock size specimens of the giant tiger shrimp *P.*  
111 *monodon* from the Indian Ocean. These were transported to a biosecure facility where they  
112 were held individually to be screened for a list of 14 viral pathogens using PCR technology.  
113 Two lots of shrimp (Lot 1 of 14 shrimp and Lot 4 of 76 shrimp) are relevant to this study. In  
114 the total of 90 shrimp analyzed. These lots were received in April 2018 and March 2019. The  
115 shrimp were held individually in foam boxes (approximately 35 x48x35 supplied with  
116 recirculating seawater at 30-32 ppt and 20-22oC. They were fed with a commercial shrimp feed  
117 at 1-2% per gram shrimp, 10 times per day, and excess, uneaten feed was removed once a day.

118 The experimental protocol was approved by the Shrimp Genetic Improvement Center (SGIC),  
119 National Center for Genetic Engineering and Biotechnology (BIOTEC) and National Science  
120 and Technology Development Agency (NSTDA).

121  
122 Nucleic acid templates to be used in PCR testing for IMNV and DIV1 were extracted from the  
123 tips of pleopods (abdominal swimming appendages). For pleopod clipping, approximately 20  
124 mg of tissue was clipped and homogenized in DNA lysis buffer and trizol reagent and was  
125 transferred to the laboratory for nucleic acid extraction within 3 days. Specimens from Lot 1  
126 were tested by PCR methods only. However, shrimp positive for IMNV and DIV1 from Lot 4  
127 were stunned in ice water and fixed with Davidson's fixative for standard histological analysis  
128 using hematoxylin and eosin (H&E) staining (Bell&Lightner, 1988) and for *in situ* hybridization  
129 (ISH) analysis.

130

### 131 **Preparation of DNA and RNA templates**

132 For DNA extraction, pleopod specimens collected from each shrimp were individually  
133 homogenized in DNA lysis buffer (50 mM Tris-base, 100 mM EDTA, 50 mM NaCl, 2% (w/v)  
134 SDS and 100 µg/ml proteinase K) and incubated at 56°C for 1 h before extraction using a  
135 QIAamp DNA Mini Kit (Qiagen, Germany) according to the manufacturer's directions. For  
136 RNA extraction, pleopods were homogenized in 1 ml of Trizol Reagent (Invitrogen, USA) and  
137 extracted following the Trizol reagent protocol. The RNA pellet was resuspended with 30 µl of  
138 DNase/RNase free water and digested with DNase I (NEB) following the manufacturer protocol.  
139 Subsequently, the sample was re-extracted by the same method. Total DNA and RNA  
140 concentration were determined by Qubit 3.0 Fluorometer (Life Technologies)

141

### 142 **RT-PCR methods for IMNV**

143 Two methods were used for RT-PCR detection of IMNV. One followed the original protocol  
144 (Poulos Lightner, 2006; Poulos, et al., 2006) that is also the recommended method of the World  
145 Organization for Animal Health (OIE) in its Manual of Diagnostic Tests for Aquatic Animals  
146 (Anonymous, 2017). It targets the major capsid protein (MCP) gene of IMNV. Here it is called  
147 the IMNV-O method. The other followed a later publication (Senapin, et al., 2007) (here called  
148 the IMNV-S method). It targets the RNA-dependent, RNA polymerase (RdRp) gene of IMNV.  
149 Briefly for the IMNV-O method, the first step primers were 4587F: 5'-CGA  
150 CGCTGCTAACCATACAA-3' and 4914R: 5'-ACTCGGCTGTTCGATCAAGT-3'. The  
151 reaction mix contained 1X Reaction Mix (Invitrogen), 0.4 µM each primer, 1 µl of SuperScript  
152 III RT/Platinum Taq Mix (Invitrogen, USA) and 20 ng of RNA template in 25 µl total reaction  
153 volume. The PCR protocol was 50°C for 30 min, 94°C for 2 min, followed by 35 cycles of  
154 94°C for 30 sec, 60°C for 30 sec and 68°C for 45 sec followed by extension at 68°C for 5 min.  
155 The nested step primers were 4725NF:5'-GGCACATGCTCAGAGACA3' and 4863NR: 5'-  
156 AGCGCTGAGTCCAGTCT TG-3' and the reaction mix contained 1 µl of first PCR product,

157 1X OneTaq Hot Start Master Mix (NEB), 0.2  $\mu$ M each primer in a total volume of 25  $\mu$ l. The  
158 PCR protocol was 94°C for 5 min, followed by 30 cycles of 94°C for 30 sec 60°C for 30 sec  
159 and 72°C for 30 sec followed by extension at 72°C for 5 min. The amplicons yielded were 328  
160 bp and 139 bp, respectively.

161

162 For IMNV-S, the first step primers were IMNV F13: 5'-TTTATACACCGCAAGAATTGG  
163 CCAA-3' and IMNV R13: 5'-AGATTTGGGAGATTGGGTCGTATCC-3' with an expected  
164 amplicon of 600 bp. The nested step primers were IMNV F13N: 5'- TGTTTATGCTTGGGA  
165 TG GAA-3' and IMNV R13N: 5'- TCGAAAGTTGTTGGCTGATG-3' with an expected  
166 amplicon of 282 bp. First step reaction mix contained 1X Reaction Mix (Invitrogen), 0.4  $\mu$ M  
167 each primer, 1  $\mu$ l of SuperScript III RT/Platinum Taq Mix (Invitrogen, USA) and 20 ng of RNA  
168 template in a total reaction volume of 25  $\mu$ l. The PCR protocol was 50°C for 30 min, 94°C for  
169 2 min, followed by 35 cycles of 94°C for 30 sec, 45°C for 30 sec and 72°C for 45 sec followed  
170 by extension at 72°C for 5 min. The nested PCR mix contained 1  $\mu$ l of first PCR product, 1X  
171 OneTaq Hot Start Master Mix (NEB) and 0.2  $\mu$ M each primer in a total volume of 25  $\mu$ l. The  
172 PCR protocol was 94°C for 5 min, followed by 30 cycles of 94°C for 30 s, 60°C for 30 sec and  
173 68°C for 30 sec followed by extension at 68°C for 5 min. When RT-PCR amplicons were  
174 detected by agarose gel electrophoresis, they were cut from gels, purified, cloned and sent for  
175 sequencing by Macrogen, Korea. The sequences were then analyzed by the tools available at  
176 National Center for Biotechnology Information (NCBI).

177

#### 178 **PCR methods for DIV1**

179 Two primer sets were used for DIV1 detection; ATPase and MCP primer set at the different  
180 genome target regions. The ATPase primers were followed those described by Qiu et al. 2017  
181 with some modification. The semi-nested PCR profile with the primers SHIV-F1 and SHIV-R1  
182 for the first step PCR with the expected amplicon of 457 bp and the primers SHIV-F1 and  
183 SHIV-R2 for the second step PCR with the expected amplicon of 213 bp. The second set was  
184 designed from the GenBank record of the DIV1 major capsid protein (MCP) as an in-house,  
185 confirmatory method. The primers for the first step reaction were DIV1-F576: 5'-  
186 TAGCAGCTTCGGAGCATTGA-3' and DIV1-R576: 5'-GCAAGGTTCTCAGG TTGGA-3'  
187 with an expected amplicon size of 576 bp. The primers for nested step were DIV1-F409: 5'-  
188 TAATCGGCAGTCATCACGGG-3' and DIV1-R576: 5'-GCAAGGTTCTCAGG TTGGA-3'  
189 with an expected amplicon size of 409 bp. The first step PCR reaction mixture contained 1  $\mu$ l  
190 of DNA template, 1X OneTaq Hot Start Master Mix (NEB), 0.4  $\mu$ M each primer in total volume  
191 of 25  $\mu$ l. The PCR protocol was 94°C for 5 min, followed by 35 cycles of 94°C for 30 sec,  
192 58°C for 30 sec and 72°C for 45 sec followed by extension at 72°C for 5 min. The semi-nested  
193 reaction mixture contained 1  $\mu$ l of first PCR product, 1X OneTaq Hot Start Master Mix (NEB)  
194 and 0.2  $\mu$ M each primer in a total volume of 25  $\mu$ l. The PCR protocol was at 94°C for 5 min,

195 followed by 25 cycles of 94°C for 30 sec, 58°C for 30 sec and 72°C for 30 sec followed by  
196 extension at 72°C for 5 min.

197

### 198 **Amplicon sequencing and analysis**

199 PCR amplicons were cloned and sent to Macrogen, Korea for sequencing. The sequences were  
200 analyzed by tools available at the website of the National Center for Biotechnology Information  
201 (NCBI). For each sample sent for sequencing, at least 3 clones were sequenced from both  
202 strands and a consensus sequence was obtained via multiple alignment of the results for each  
203 sample. When a difference occurred at 1 position in one strand of the alignment but was the  
204 same in two or more remaining strands, the latter base was included in the consensus sequence.  
205 This happened not more than 3 times for any consensus sequence.

206

### 207 **Histological analysis and *in situ* hybridization (ISH) assays**

208 Living shrimp were stunned in a seawater ice bath before being injected with Davidson's  
209 fixative and processed for embedding in paraffin blocks in order to cut tissue section for  
210 staining with hematoxylin and eosin (H&E) as previously described (Bell Lightner, 1988). Only  
211 specimens from Lot 4 that gave positive test results for either IMNV or DIV1 were processed  
212 further for histological analysis. *In situ* hybridization assays were carried out using adjacent  
213 tissue sections from the same paraffin blocks used for H&E-stained sections. For both IMNV  
214 and DIV1, H&E-stained tissue sections from the respective shrimp specimens were examined  
215 for the presence of the characteristic lesions for each pathogen as described in the introduction  
216 section. Positive control material for ISH assays for DIV1 consisted of microscope slides  
217 prepared from paraffin blocks derived from a laboratory challenge test with *P. vannamei*. The  
218 positive control material for ISH assays for IMNV consisted of a paraffin block of IMNV-  
219 infected tissue of *P. vannamei* purchased from the University of Arizona. Aquaculture  
220 Pathology Laboratory.

221

### 222 **For DIV1-ISH testing**

223 The PCR primer pairs of the first step of the ATPase gene detection method (amplicon size 457  
224 bp) and the MCP gene detection method (amplicon size 576 bp) were used to prepare DIG-  
225 labeled DIV1 probes. Briefly, The DNA probes were generated using a PCR DIG labeling kit  
226 (Roach, Germany) followed by purification using a Gel/PCR cleanup kit (Geneaid, Taiwan)  
227 according to the manufacturer's directions. The ISH protocol was performed as follows: the  
228 slides of adjacent tissue sections were incubated at 60°C for 1 h, deparaffinized, rehydrated in  
229 a series of graded ethanol, distilled water and TNE buffer. Tissue slides were treated with  
230 5µg/ml proteinase K in TNE buffer (500 mM Tris-Cl, 100 mM NaCl, 10 mM EDTA) at 37°C  
231 for 15 min in humidified chamber. The slides were incubated with 0.5M EDTA for 1 h, cold  
232 4% formaldehyde for 5 min and distilled water at room temperature (RT) for 5 min. The sections  
233 were incubated in pre-hybridized buffer (4X SSC containing 50% (v/v) deionized formamide) at

234 37°C for at least 10 min. Then, 100-200 ng of each DIG-labeled probe, was mixed with  
235 hybridization buffer (50% deionized formamide, 5% (w/v) dextran sulfate, 1X Denhardt's solution  
236 (Sigma, USA), 0.25 mg/ml salmon sperm DNA (Invitrogen) and 4X SSC before denaturation at  
237 95°C for 5 min followed by immediate chilling on ice. The denatured probes were then pipetted  
238 onto each slide and covered with a cover slip after which the slides were heated at 95°C for 7  
239 min. They were then incubated at 42°C overnight in a humidified chamber. The slides were  
240 washed in 2X SSC at 37°C, 1X SSC at 42°C, 0.5X SSC at 42°C and then Buffer I (1M Tris-  
241 HCL, 1.5M NaCl, pH 7.5) for 5 min. Next, the slides were incubated with 0.5% blocking buffer  
242 (Roche, Germany) in 1X Buffer I at RT for 1 h before incubation with 1:500 anti-DIG-AP  
243 antibody solution at 37°C for 1 h and final washing with 2X10 min Buffer I. The signal was  
244 developed using NBT/BCIP solution (Roche, Germany) in a dark chamber at RT after which  
245 each slide was counterstained with 0.5% Bismarck Brown Y (Sigma, USA) before dehydration,  
246 addition of a drop of Permout (Fisher Scientific, USA) and covering with a cover glass for  
247 examination by light microscopy.

248

## 249 **RESULTS**

### 250 **Order of presentation and overview of PCR and histological results**

251 From shrimp Lot 1 (14 specimens, April 2018), 2 specimens gave positive RT-PCR test results  
252 for IMNV and 5 gave positive test results for DIV1. No samples were prepared for histological  
253 analysis for specimens of Lot 1. From shrimp Lot 4 (76 specimens, March 2019), 4 samples  
254 were RT-PCR positive for IMNV and 8 were PCR positive for DIV1. None of the specimens  
255 were positive for both IMNV and DIV1. In the following sections, results from the shrimp  
256 positive for IMNV (Lots 1 and 4) will be covered first, followed by results for DIV1 from Lot  
257 4. No sequencing was done with the IMNV positive samples in Lot 4 because they were positive  
258 by one PCR method only. However, histological results and ISH test results are presented. For  
259 DIV1 samples, PCR results, amplicon sequencing results, histology results and ISH results are  
260 presented.

261

### 262 **Positive RT-PCR results and amplicon sequencing for IMNV from Lot 1**

263 In specimen Lot 1, using the IMNV-O method for IMNV detection, we obtained positive nested  
264 RT-PCR test results for 2 specimens from 26 tested (**Fig. 1**). The amplicons were sequenced and  
265 aligned with the homologous region of the MCP gene from 3 full IMNV reference sequences  
266 at GenBank (**Fig. 2**). One reference sequence was from the first report of IMNV in Brazil in 2006  
267 (GenBank AY570982.3) (Poulos, et al., 2006), another from Brazil in 2014 (KJ556923.1) and yet  
268 another from Indonesia in 2007 (EF061744.1). The alignment revealed that our sequences from  
269 specimens 1 & 2 were identical to one another, as were the two sequences from Brazil.  
270 Excluding the primer sequences outlined in Fig 2, our two sequences from *P. monodon* differed  
271 from the two Brazilian sequences for only 1 base in 288, giving a sequence identity of 287/288

272 = 99.7%. In contrast, they differed by 2 bases with the sequence from Indonesia, giving a  
273 sequence identity of 99.3%. In contrast, the deduced amino acid sequences for all five records  
274 were 100% identical, indicating that the base differences represented synonymous mutations.

275

276 **Figure 1.** Photographs of agarose gels to detect amplicons from use of the IMNV-O and IMNV-S  
277 methods for 2 shrimp specimens (1 & 2) from Lot 1. Both specimens were positive with both methods.  
278 M = molecular marker; -ve = negative control; +ve = positive control.

279

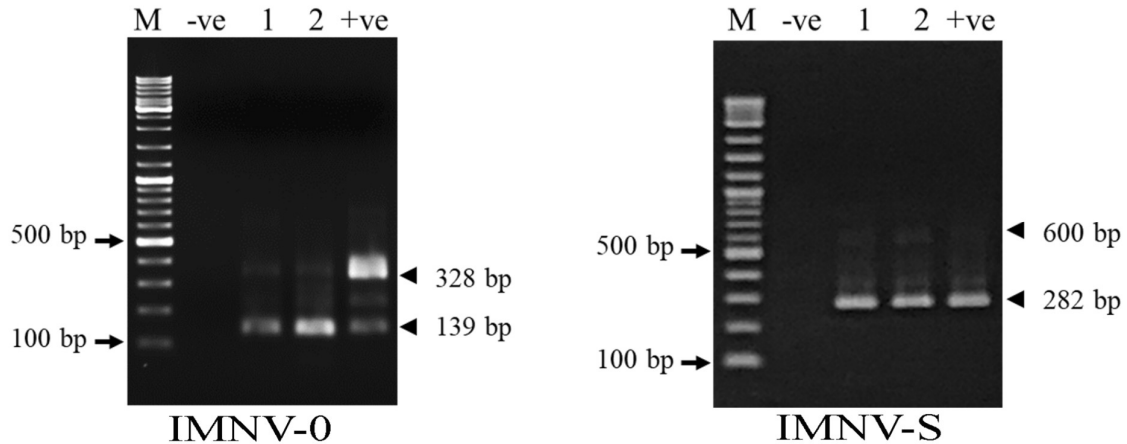

280

281

282

283 **Figure 2.** Multiple alignment of the IMNV-O amplicon sequences from our *P. monodon* specimens 1 &  
284 2 in shrimp Lot 1 with the matching region of the MCP gene of IMNV in GenBank records AY570982.3  
285 (the first IMNV sequence from Brazil in 2006), EF061744.1 (from Indonesia in 2007) and KJ556923.1  
286 (from Brazil in 2014). Bases in grey outline indicate differences from the original sequence of  
287 AY570982.3 (top row in the alignment). The areas in boxes indicate the primer sequences. Also shown  
288 is and alignment of the deduced amino acid sequences showing 100% identity for all.

289



CLUSTAL 2.1 multiple nucleic acid sequence alignment

```

AY570982.3   CGACGCTGCTAACCATACAAACCTTTTGCTATTGAAGGAGGAAGACTCGTATATTTGGG
KJ556923.1   CGACGCTGCTAACCATACAAACCTTTTGCTATTGAAGGAGGAAGACTCGTATATTTGGG
EF061744.1   CGACGCTGCTAACCATACAAACCTTTTGCTATTGAAGGAGGAAGACTCGTATATTTGGG
P.monodon1   CGACGCTGCTAACCATACAAACCTTTTGCTATTGAAGGAGGAAGACTCGTATATTTGGG
P.monodon2   CGACGCTGCTAACCATACAAACCTTTTGCTATTGAAGGAGGAAGACTCGTATATTTGGG
*****

AY570982.3   TGGAAACAATTGCAAATACAACCAATGTGGTAAACGCAATGCAGAGGAAACAAAGGCTTTC
KJ556923.1   TGGAAACAATTGCAAATACAACCAATGTGGTAAACGCAATGCAGAGGAAACAAAGGCTTTC
EF061744.1   TGGAAACAATTGCAAATACAACCAATGTGGTAAACGCAATGCAGAGGAAACAAAGGCTTTC
P.monodon1   TGGAAACAATTGCAAATACAACCAATGTGGTAAACGCAATGCAGAGGAAACAAAGGCTTTC
P.monodon2   TGGAAACAATTGCAAATACAACCAATGTGGTAAACGCAATGCAGAGGAAACAAAGGCTTTC
*****

AY570982.3   AAAACCGGCATTCAAGTGGGCACATGCTCAGAGACAACGTGTATATGACAGCAGTCGTCC
KJ556923.1   AAAACCGGCATTCAAGTGGGCACATGCTCAGAGACAACGTGTATATGACAGCAGTCGTCC
EF061744.1   AAAACCGGCATTCAAGTGGGCACATGCTCAGAGACAACGTGTATATGACAGCAGTCGTCC
P.monodon1   AAAACCGGCATTCAAGTGGGCACATGCTCAGAGACAACGTGTATATGACAGCAGTCGTCC
P.monodon2   AAAACCGGCATTCAAGTGGGCACATGCTCAGAGACAACGTGTATATGACAGCAGTCGTCC
*****

AY570982.3   AGGGATGGACGCAATCACAAGTTGTGTGCACGAAAGTCGGGTTTTATGAATGCCCGTTC
KJ556923.1   AGGGATGGACGCAATCACAAGTTGTGTGCACGAAAGTCGGGTTTTATGAATGCCCGTTC
EF061744.1   AGGGATGGACGCAATCACAAGTTGTGTGCACGAAAGTCGGGTTTTATGAATGCCCGTTC
P.monodon1   AGGGATGGACGCAATCACAAGTTGTGTGCACGAAAGTCGGGTTTTATGAATGCCCGTTC
P.monodon2   AGGGATGGACGCAATCACAAGTTGTGTGCACGAAAGTCGGGTTTTATGAATGCCCGTTC
*****

AY570982.3   CACAGCAATGATGGCACCCAAGACTGGACTCAGCGCTGTTATAGATCAAGCACCACAAATAC
KJ556923.1   CACAGCAATGATGGCACCCAAGACTGGACTCAGCGCTGTTATAGATCAAGCACCACAAATAC
EF061744.1   CACAGCAATGATGGCACCCAAGACTGGACTCAGCGCTGTTATAGATCAAGCACCACAAATAC
P.monodon1   CACAGCAATGATGGCACCCAAGACTGGACTCAGCGCTGTTATAGATCAAGCACCACAAATAC
P.monodon2   CACAGCAATGATGGCACCCAAGACTGGACTCAGCGCTGTTATAGATCAAGCACCACAAATAC
*****

AY570982.3   ATCTCAAGACTTGATCGAACAGCCGAGT
KJ556923.1   ATCTCAAGACTTGATCGAACAGCCGAGT
EF061744.1   ATCTCAAGACTTGATCGAACAGCCGAGT
P.monodon1   ATCTCAAGACTTGATCGAACAGCCGAGT
P.monodon2   ATCTCAAGACTTGATCGAACAGCCGAGT
*****

```

CLUSTAL 2.1 multiple amino acid sequence alignment

```

AY570982.3   MQRKQRLSKPAFKWAHAQRQRVYDSSRPGMDAITKLCARKSGFMNARSTAMMAPKTGLSA
KJ556923.1   MQRKQRLSKPAFKWAHAQRQRVYDSSRPGMDAITKLCARKSGFMNARSTAMMAPKTGLSA
EF061744.1   MQRKQRLSKPAFKWAHAQRQRVYDSSRPGMDAITKLCARKSGFMNARSTAMMAPKTGLSA
P.monodon1   MQRKQRLSKPAFKWAHAQRQRVYDSSRPGMDAITKLCARKSGFMNARSTAMMAPKTGLSA
P.monodon2   MQRKQRLSKPAFKWAHAQRQRVYDSSRPGMDAITKLCARKSGFMNARSTAMMAPKTGLSA
*****

AY570982.3   VIDQAPNTSQDLIEQPS
KJ556923.1   VIDQAPNTSQDLIEQPS
EF061744.1   VIDQAPNTSQDLIEQPS
P.monodon1   VIDQAPNTSQDLIEQPS
P.monodon2   VIDQAPNTSQDLIEQPS
*****

```

290  
291

292 Using the IMNV-S method for IMNV detection with the 2 specimens in Lot 1, we obtained  
293 positive RT-PCR results (Fig. 1) for the same 2 specimens that gave positive results with the  
294 IMNV-O method above. The 2 amplicons were sequenced and aligned with the homologous  
295 regions of the RdRp gene from the same GenBank reference sequences as used above for the  
296 MCP gene. The results revealed that the sequences from our *P. monodon* specimens 1 & 2 were  
297 identical to one another but differed from the original GenBank sequence by 5 bases, resulting  
298 in  $237/242 = 97.9\%$  identity (i.e., excluding the primer sequences) (Fig. 3). However, translation to  
299 the deduced amino acid sequences followed by alignment revealed that 4 of the differences

300 constituted synonymous mutations in the RdRp gene. The one exception was the change from  
301 glutamic acid (E) to lysine (K), denoted by Clustal 2.1 as a conservative replacement. We found  
302 it curious that the MCP gene from our samples was more conserved than the RdRp gene, since  
303 changes in the latter would seem to be more critical for viral survival than changes in the MCP  
304 gene. It is unknown whether this change would affect the virulence of IMNV.

305

306 **Figure 3.** Multiple alignment of the IMNV-S amplicon sequences from specimens 1 & 2 from shrimp  
307 Lot 1 with the RdRp gene of IMNV with the same GenBank records used in Fig. 2 above. Bases in white  
308 text and black outline indicate difference from the sequence of AY570982.3. Also included is an  
309 alignment of the deduced amino acid sequences with only one amino acid difference in the *P. Monodon*  
310 samples from the Indian Ocean.

CLUSTAL 2.1 multiple alignment of amplicon sequences

```
AY570982.3  TGTTTATGCTTGGGATGGAAAGTTACATTCACGTGCTTTATTAAAAACGAAATGAGTAA
KJ556923.1  TGTTTATGCTTGGGATGGAAAGTTACATTCACGTGCTTTATTAAAAACGAAATGAGTAA
EF061744.1  TGTTTATGCTTGGGATGGAAAGTTACATTCACGTGCTTTATTAAAAACGAAATGAGTAA
P.monodon1  TGTTTATGCTTGGGATGGAAAGTTACATTCACGTGCTTTATTAAAAACGAAATGAGTAA
P.monodon2  TGTTTATGCTTGGGATGGAAAGTTACATTCACGTGCTTTATTAAAAACGAAATGAGTAA
*****
```

```
AY570982.3  ATTAAGACTTGCTGTGGCATCTAACATCGAAGCATATATTCATGAATCTTATATGCTTTT
KJ556923.1  ATTAAGACTTGCTGTGGCATCTAACATCGAAGCATATATTCATGAATCTTATATGCTTTT
EF061744.1  ATTAAGACTTGCTGTGGCATCTAACATCGAAGCATATATTCATGAATCTTATATGCTTTT
P.monodon1  GTTAAGACTTGCTGTGGCATCTAACATCGAAGCATATATTCACGAATCTTATATGCTTTT
P.monodon2  GTTAAGACTTGCTGTGGCATCTAACATCGAAGCATATATTCACGAATCTTATATGCTTTT
*****
```

```
AY570982.3  CCTATATGGTCATGGTTTTAAAGAATACTTTGGAGTGACGCTTGACGAAAAACAGATCA
KJ556923.1  CCTATATGGTCATGGTTTTAAAGAATACTTTGGAGTGACGCTTGACGAAAAACAGATCA
EF061744.1  CCTATATGGTCATGGTTTTAAAGAATACTTTGGAGTGACGCTTGACGAAAAACAGATCA
P.monodon1  CCTATATGGTCATGGTTTTAAAGAATACTTTGGAGTGACGCTTGACGAAAAACAGATCA
P.monodon2  CCTATATGGTCATGGTTTTAAAGAATACTTTGGAGTGACGCTTGACGAAAAACAGATCA
*****
```

```
AY570982.3  ACAGCATCAGAGAGAAATTGAAATGATTGAGAAACTACAAGCTGGATACTTTGGATTACC
KJ556923.1  ACAGCATCAGAGAGAAATTGAAATGATTGAGAAACTACAAGCTGGATACTTTGGATTACC
EF061744.1  ACAGCATCAGAGAGAAATTGAAATGATTGAGAAACTACAAGCTGGATACTTTGGATTACC
P.monodon1  ACAGCATCAAAGAGAAATTGAAATGATTGAGAAACTACAAGCTGGATACTTTGGATTACC
P.monodon2  ACAGCATCAAAGAGAAATTGAAATGATTGAGAAACTACAAGCTGGATACTTTGGATTACC
*****
```

```
AY570982.3  ATTTGACTATGCATCATTGATCATCAGCCAACAACCTTTCGA
KJ556923.1  ATTTGACTATGCATCATTGATCATCAGCCAACAACCTTTCGA
EF061744.1  ATTTGACTATGCATCATTGATCATCAGCCAACAACCTTTCGA
P.monodon1  ATTTGACTATGCATCATTGATCATCAGCCAACAACCTTTCGA
P.monodon2  ATTTGACTATGCATCATTGATCATCAGCCAACAACCTTTCGA
*****
```

CLUSTAL 2.1 multiple alignment of deduced amino acid sequences

```
AY570982.3  MSKLR LAVASNIEAYIHESYMLFLYGHGFKEYFGVTLDEKPDQQHQREIEMIEKLQAGYF
KJ556923.1  MSKLR LAVASNIEAYIHESYMLFLYGHGFKEYFGVTLDEKPDQQHQREIEMIEKLQAGYF
EF061744.1  MSKLR LAVASNIEAYIHESYMLFLYGHGFKEYFGVTLDEKPDQQHQREIEMIEKLQAGYF
P.monodon1  MSKLR LAVASNIEAYIHESYMLFLYGHGFKEYFGVTLDEKPDQQHQREIEMIEKLQAGYF
P.monodon2  MSKLR LAVASNIEAYIHESYMLFLYGHGFKEYFGVTLDEKPDQQHQREIEMIEKLQAGYF
*****
```

```
KJ556923.1  GLPFDYASFDHQPTTF
EF061744.1  GLPFDYASFDHQPTTF
P.monodon1  GLPFDYASFDHQPTTF
P.monodon2  GLPFDYASFDHQPTTF
*****
```

311

312

313 In summary, the 2 IMNV-positive specimens from Lot 1 gave identical amplicons for two  
314 different IMNV genes that shared 98-99% identity to the matching sequences from 3 full  
315 genome sequences for IMNV isolates from diseased shrimp from Brazil and Indonesia. These  
316 results suggest that the 2 *P. monodon* specimens captured from the Indian Ocean wild fishery  
317 may have carried an infectious form of IMNV. However, confirmation of this possibility would  
318 require at least full genome sequencing and at best bioassays. As stated in the first section of  
319 the results, we were unable to do histological or ISH analysis with these specimens.

320

#### 321 **Positive RT-PCR results and amplicon sequencing for IMNV from Lot 4**

322 In specimen Lot 4, using the IMNV-O method for IMNV detection, we obtained positive nested  
323 RT-PCR test for 4 specimens from 76 tested (**Fig. 4**). In contrast to Lot 1, these 4 specimens  
324 gave no amplicons using the IMNV-S method (**Fig. 4**).

325

326 **Figure 4.** Photographs of agarose gels to detect amplicons from use of the IMNV-O and IMNV-S  
327 methods for 4 shrimp specimens (1 to 4) from Lot 4. The 4 specimens were positive with the IMNV-O  
328 method but negative with the IMNV-S method. M = molecular marker; -ve = negative control; +ve =  
329 positive control.

330

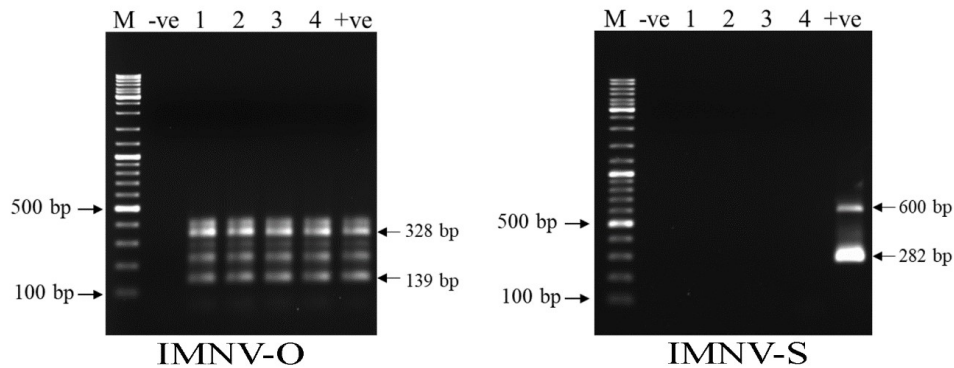

341 The IMNV RT-PCR test results with the 4 shrimp in these samples suggested that they do not  
342 carry the full genome sequence of what is currently recognized as infectious IMNV. These  
343 samples were not studied further. There are several possibilities that may have given rise to  
344 these results. The most obvious possibility is that the shrimp may have carried a mutant form  
345 of IMNV in which the sequence of the RdRp gene was sufficiently changed to no longer match  
346 the sequence of the primers for the IMNV-S method. It is also possible that the positive IMNV-  
347 O result arose from an endogenous viral element (EVE) that produced an RNA transcript with  
348 sufficient sequence similarity to give amplicons with the method. To check this possibility, we  
349 treated DNA extracts from these specimens with RNase and then carried out direct PCR  
350 reactions (i.e., no reverse-transcriptase step for cDNA production) with the same IMNV-O  
351 primer set, but no amplicons resulted (not shown). We did not sequence the amplicons. However,  
352 tissue sections were examined for muscle lesions (see the next section).

353

354 **Muscle lesions seen in Lot 4 IMNV PCR-positive samples**

355 Muscle lesions similar to those caused by IMNV were seen in the 4 shrimp samples positive  
356 for IMNV by the IMNV-O method. An example is shown in **Fig. 5A**. Most of the lesions did not  
357 show hemocytic aggregation. None showed basophilic cytoplasmic inclusions characteristic of  
358 IMNV lesions reported for penaeid shrimp including *P. monodon* (Tang, et al., 2005). The  
359 problem is that muscle lesions that may or may not cause gross whitening of muscles in living  
360 shrimp can be caused simply by stress such as handling (e.g., muscle cramp syndrome or  
361 idiopathic myonecrosis) (Lightner, 1988) or by other viruses such as *Macrobrachium*  
362 *rosenbergii* nodavirus (MrNV) (Sahul Hameed, et al., 2004; Sri Widada, et al., 2003) and  
363 *Penaeus vannamei* nodavirus (PvNV) (Tang, et al., 2007; Tang, et al., 2011). Thus, further testing  
364 by ISH and immunohistochemistry were needed to conform whether the lesions exemplified in  
365 Fig. 4A arose from IMNV or not. To this end, tissue sections showing these lesions were tested  
366 for the presence of IMNV by ISH using probes for both the IMNV-O target and the IMNV-S  
367 target (**Fig. 5C&D**), but all gave negative test results, in contrast to the positive control obtained  
368 from Arizona.

369

370 **Brief summary for IMNV results**

371 In summary, our results have revealed by 2 RT-PCR methods that some captured specimens of  
372 *P. monodon* from the Indian Ocean may carry infectious IMNV. This cannot be confirmed  
373 without full genome sequencing and bioassays. However, the results were unexpected and  
374 warrant caution in the use of captured broodstock in shrimp hatcheries, and especially those  
375 hatcheries that also process *P. vannamei* or produce *P. monodon* PL that are destined for use on  
376 farms where *P. vannamei* is also cultivated.

377

378 **Figure 5.** Photomicrographs  
379 showing examples of muscle  
380 lesions in *P. monodon* samples  
381 from Lot 4 positive for IMNV  
382 using the IMNV-O method  
383 only. Asterisks indicate the  
384 same relative position in  
385 adjacent tissue sections. (A)  
386 H&E stained tissue section  
387 showing muscle necrosis. (B)  
388 ISH results for the negative (no  
389 probe) control showing no  
390 signal. (C) ISH result for the  
391 IMNV-O probe showing no  
392 signal. (D) ISH results for the  
393 IMNV-S probe showing no  
394 signal. (E) H&E stained tissue  
395 section of the positive control  
396 tissue showing IMNV muscle  
397 lesions. (F) Positive control  
398 tissue section showing a  
399 positive ISH reaction for  
400 IMNV using the IMNV-O

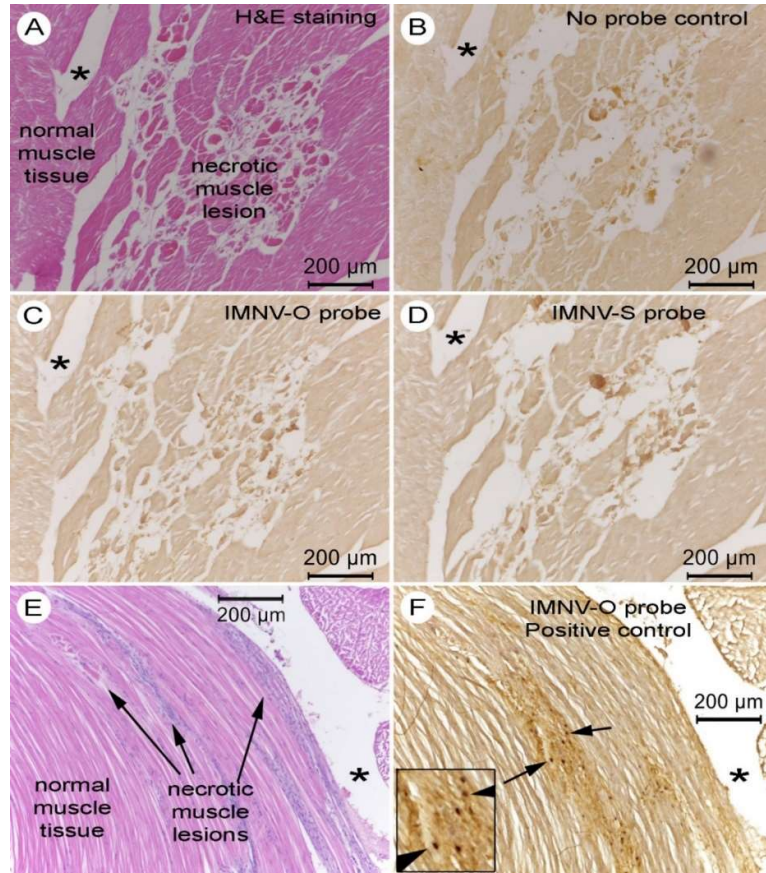

401 method. The inset shows a magnification of area with positive ISH reactions.

402

#### 403 **Positive PCR test results for DIV1**

404 The positive PCR test results for ATPase method were found in both shrimp sample Lot 1 and  
405 Lot 4. Shrimp positive ATPase methods were 5 (out of 14) and 8 (out of 76) for Lot 1 and Lot  
406 4, whereas only 1 shrimp from each Lot found positive for both ATPase and MCP (#3 for Lot  
407 1 and #2 for Lot 4) (**Fig. 6**).

408

409 **Figure 6.** Photograph of the agarose gels showing PCR results for the ATPase and MCP methods in 5  
410 out of 14 in specimen Lot 1 (a) and 8 out of 76 shrimp samples in specimen Lot 4 (b). Only 1 out of 5  
411 specimens with ATPase positive in Lot 1 and 1 out of 8 specimens with ATPase positive in Lot 4 also  
412 gave a positive test result with the MCP method.

413

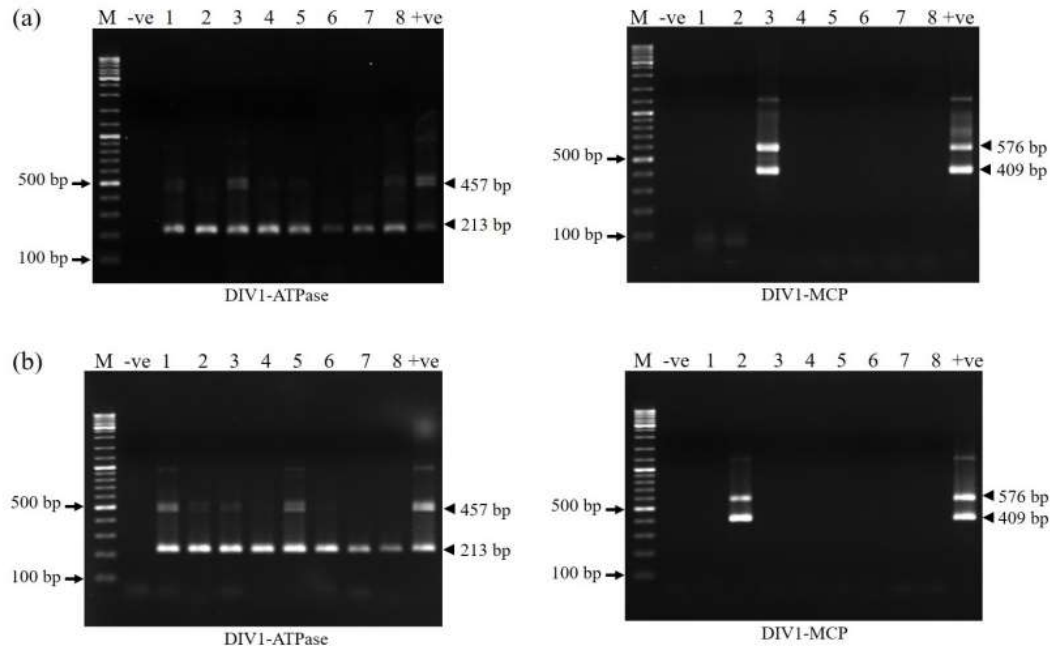

414

415

416

417 The PCR results for the ATPase and MCP methods for detection of DIV1 were both positive  
418 for only one specimen of each Lot. This suggested that this specimen might have carried DIV1.

419 Thus, the specimens from Lot 4 were subjected to sequencing and analysis of the amplicons  
420 from the two PCR methods. As can be seen in **Figs. 7 and 8**, the sequence identities were 100%  
421 for both amplicons when compared to the matching regions of the full genome of DIV1  
422 (GenBank KY681040.1).

423

424 **Figure 7.** Alignment of the amplicon sequence obtained using the ATPase method compared to the  
425 matching region of the full genome of DIV1 (GenBank KY681040.1). The primer sequences are  
426 underlined.

427

```

P. monodon 1 GGGCGGGAGATGGTGTAGATGGGCAGTCATGGATGAACCAAATGCTGACGAAATCATCA 60
KY681040.1 458 GGGCGGGAGATGGTGTAGATGGGCAGTCATGGATGAACCAAATGCTGACGAAATCATCA 517

P. monodon 61 GTTCCGGGAACGTTAAAGGGTCTCACGGGAAACGATTTCGTATTGGGCTCGAGATTTGTTCC 120
KY681040.1 518 GTTCCGGGAACGTTAAAGGGTCTCACGGGAAACGATTTCGTATTGGGCTCGAGATTTGTTCC 577

P. monodon 121 AACGAGGAAAGGAAACGAAAGAAATTATACCCTTTTTCAAATTACACATGATTTGCAACA 180
KY681040.1 578 AACGAGGAAAGGAAACGAAAGAAATTATACCCTTTTTCAAATTACACATGATTTGCAACA 637

P. monodon 181 AGCTTCCAGCAATCAAGGATGCCGATCAAGCAACGTGGAATCGAATCAGGGTTATTCAT 240
KY681040.1 638 AGCTTCCAGCAATCAAGGATGCCGATCAAGCAACGTGGAATCGAATCAGGGTTATTCAT 697

P. monodon 241 TCGAAAGTACATTCAAACATGAAAACGATTGCCCGGTTGAATTTGAAGAACAATGAAAC 300
KY681040.1 698 TCGAAAGTACATTCAAACATGAAAACGATTGCCCGGTTGAATTTGAAGAACAATGAAAC 757

P. monodon 301 AGAAAACATTCCCCATGGATAAAAATTTACAGAAAAGATTCCCGAAATGGTAAAACCCC 360
KY681040.1 758 AGAAAACATTCCCCATGGATAAAAATTTACAGAAAAGATTCCCGAAATGGTAAAACCCC 817

P. monodon 361 TGGCTTGGTATCTTATTCAGAGATGGAAGACTATCAGGAAGTGTGAAATTGTAGAGCCAG 420
KY681040.1 818 TGGCTTGGTATCTTATTCAGAGATGGAAGACTATCAGGAAGTGTGAAATTGTAGAGCCAG 877

P. monodon 421 AGATTGTAACGGTAGCTACATCTTCGTACCGAAACGA 457
KY681040.1 878 AGATTGTAACGGTAGCTACATCTTCGTACCGAAACGA 914

```

428 **Figure 8.** Alignment of the amplicon sequence obtained using the MCP method compared to  
429 the matching region of the full genome of DIV1 (GenBank KY681040.1). The primer sequences  
430 are underlined,  
431

```

P. monodon 1 TAGCAGCTTCGGAGCATTGAAGTTGGATACTCACATTGTTTCAGGATGCTGTAATTGGCAG 60
KY681039.1 1300 TAGCAGCTTCGGAGCATTGAAGTTGGATACTCACATTGTTTCAGGATGCTGTAATTGGCAG 124

P. monodon 61 ACCCAGAAGGATCAACATTGTTTCATCTTGAGAGCGTAAGAGAACATGTGGTATCCGGTGA 120
KY681039.1 1240 ACCCAGAAGGATCAACATTGTTTCATCTTGAGAGCGTAAGAGAACATGTGGTATCCGGTGA 118

P. monodon 121 GTTCCGGGAATGGCCGGTGCCTTGTAGTAGGGTTCGATCAGTGAGAAGTAATCGGCAGTCA 180
KY681039.1 1180 GTTCCGGGAATGGCCGGTGCCTTGTAGTAGGGTTCGATCAGTGAGAAGTAATCGGCAGTCA 1121

P. monodon 181 TCACGGGAATACGATCTGAAGATTCGTATCTAATGTTTGCCTGATGGGATCGAATG 240
KY681039.1 1120 TCACGGGAATACGATCTGAAGATTCGTATCTAATGTTTGCCTGATGGGATCGAATG 1061

P. monodon 241 CGCTCTGATCTGGGTGCAAAATCAATCTTGTTCGGCGTCGGGTACGGGTGATGCGGTTGTGT 300
KY681039.1 1060 CGCTCTGATCTGGGTGCAAAATCAATCTTGTTCGGCGTCGGGTACGGGTGATGCGGTTGTGT 1001

P. monodon 301 AATTGGACCAAACATTTGGATTGGTAGTGTTCCTGACACCGAAGAAGAGAGCCTTTACAG 360
KY681039.1 1000 AATTGGACCAAACATTTGGATTGGTAGTGTTCCTGACACCGAAGAAGAGAGCCTTTACAG 941

P. monodon 361 TTCTCTGGAACCTGATGTCGTAAGAGGGATTTGGGTTGAGGACGGGGTTAAAGTTGAGCT 420
KY681039.1 940 TTCTCTGGAACCTGATGTCGTAAGAGGGATTTGGGTTGAGGACGGGGTTAAAGTTGAGCT 881

P. monodon 421 TGGAAGAAGTCTGGATAGATTCAATCAACATGTCGCGGTGAACACATCCCATACGTGCTC 480
KY681039.1 880 TGGAAGAAGTCTGGATAGATTCAATCAACATGTCGCGGTGAACACATCCCATACGTGCTC 821

P. monodon 481 GCTCGGCTTCGGGGATAAGACCACCATTACCCAACATTGCACATTTGACAGTGAGGGGG 540
KY681039.1 820 GCTCGGCTTCGGGGATAAGACCACCATTACCCAACATTGCACATTTGACAGTGAGGGGG 761

P. monodon 541 CAACGGCGATATCACTTCCAACCTGAGGAACCTTGC 576
KY681039.1 760 CAACGGCGATATCACTTCCAACCTGAGGAACCTTGC 725

```

432

433 The PCR positive results and sequencing results for 2 distantly separated genes in the DIV1  
434 genome for 1 out of 76 specimens in shrimp Lot 4 raised the possibility that captured,  
435 broodstock-size specimens of *P. monodon* from the Indian Ocean may be infected with a  
436 virulent type of DIV1. However, it is important to understand that this possibility cannot be  
437 substantiated without full sequencing of the whole viral genome accompanied with bioassays.  
438 As with IMNV above, this was an unexpected result, but of sufficient importance to warrant  
439 caution in the use of captured *P. monodon* for broodstock in shrimp hatcheries and especially  
440 in those hatcheries that also process *P. vannamei* or produce PL for use on farms where *P.*  
441 *vannamei* is also cultivated.

442

#### 443 **Lack of gross and histological signs of DIV1 infection**

444 All 8 of the specimens positive for DIV1 in Lot 4 using the ATPase method were grossly  
445 normal and showed no gross signs of DIV1 infection, including the 1 specimen also positive  
446 for DIV1 using the MCP method. Of the 6 of 8 specimens arbitrarily selected for ISH testing,  
447 (including the one positive for both the ATPase and MCP methods), all showed normal HPT  
448 histology (**Fig 9A**) and normal LO histology (**Fig. 10A**) except, sometimes for the presence of  
449 spheroids in the latter. Such spheroids have not been reported to be associated with DIV1-  
450 infection. Those not familiar with the pathognomonic lesions in of DIV1 in the HPT and its  
451 lesions in the LO may download the DIV1 disease card for free from the website of the Network  
452 of Aquaculture Centres in Asia Pacific (NACA). All the other specimens gave similar results  
453 for HPT and LO histology.

454

455 Although all the 8 specimens positive for DIV1 by PCR using the ATPase method gave  
456 negative RT-PCR test results for IMNV, 5 out of the 6 examined histologically showed necrotic  
457 muscle lesions, similar to those seen with the specimens above that gave positive RT-PCR test  
458 results but negative ISH test results for IMNV. Thus, the results from the DIV1 positive  
459 specimens support the proposal above that the muscle lesions that gave negative ISH results  
460 for IMNV were probably expressions of idiopathic myonecrosis (Lightner, 1988).



461  
462  
463  
464  
465  
466  
467  
468  
469  
470  
471  
472  
473  
474  
475  
476  
477  
478  
479  
480  
481  
482  
483  
484  
485  
486  
487  
488  
489  
490  
491  
492  
493  
494  
495  
496  
497

**Figure 9.**

Example photomicrographs of the HPT from one of the 4 PCR-positive DIV1 specimens arbitrarily selected for ISH analysis (including the specimen positive for both target genes). (A) H&E stained HPT section showing normal histology (i.e., absence of DIV1 lesions characterized by lightly basophilic cytoplasmic inclusions). (B) Negative, no-probe control ISH reaction with an adjacent tissue section showing no signals. (C) Negative ISH reaction with the DIV1-DIG-labeled probe for the ATPase gene. Similar results were obtained for all 4 specimens with both the ATPase and the MCP probe.

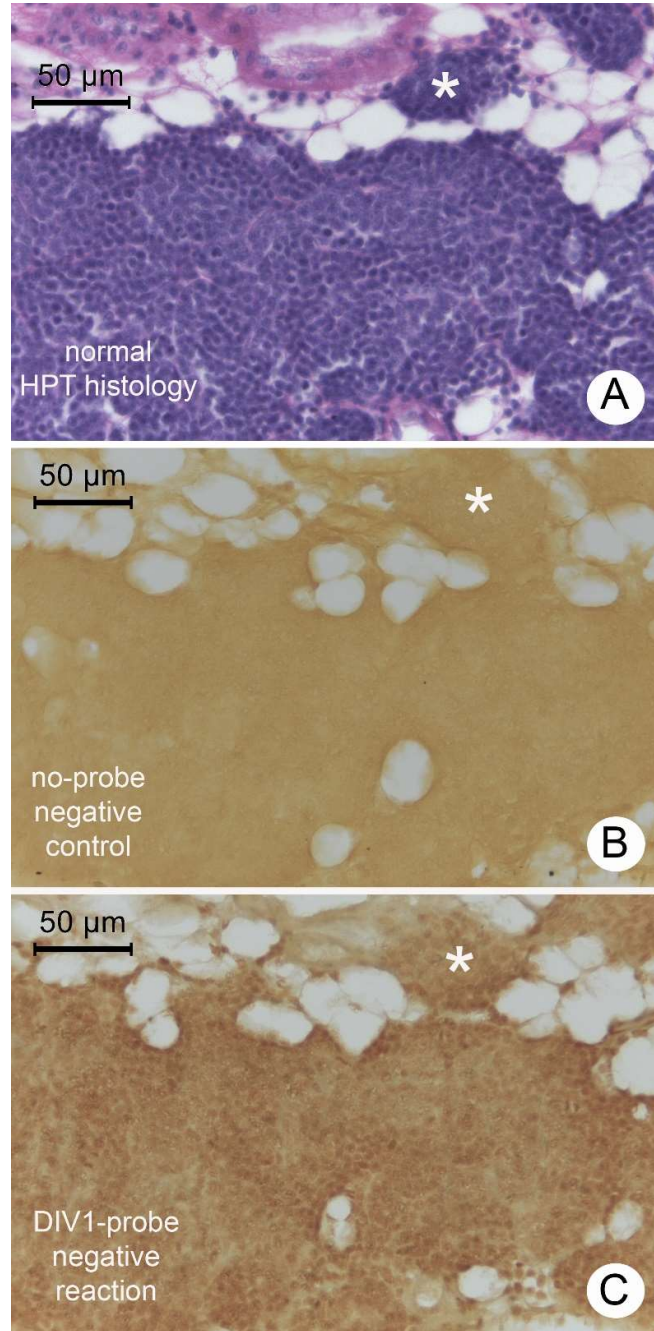

498

499

500 **Figure 10.**

501 Example photomicrographs the LO  
502 tissue one of 4 PCR-positive DIV1  
503 specimens selected for ISH analysis. (A)

504 H&E stained LO section showing  
505 normal tubule histology (i.e., absence of  
506 DIV1 lesions characterized densely  
507 basophilic cytoplasmic inclusions and  
508 pyknotic and karyorrhectic nuclei). (B)

509 Negative, no-probe control ISH  
510 reaction with an adjacent tissue section  
511 showing no signals. (C) Curious ISH  
512 reaction with the DIV1-DIG-labeled  
513 probe showing dark staining in the  
514 nuclei but not the cytoplasm of both  
515 tubule matrix cells and cells in  
516 spheroids.

517

518

519

520

521

522

523

524

525

526

527

528

529

530

531

532

533

534 **Typical, positive ISH results for DIV1 in the LO and HP**

535 Example photomicrographs of unusual ISH test results for DIV1 in the LO and HP tissue of  
536 the same 4 shrimp specimens that gave negative ISH reactions for DIV1 in the HPT. These  
537 unusual results are shown in **Figs. 10C and 11C** where positive ISH results can be seen in the  
538 nuclei of some cells in the LO and HP in the absence of DIV1 histopathology. The same result  
539 was obtained in the ISH tests with all 4 samples tested, including 3 positive for DIV1 by PCR

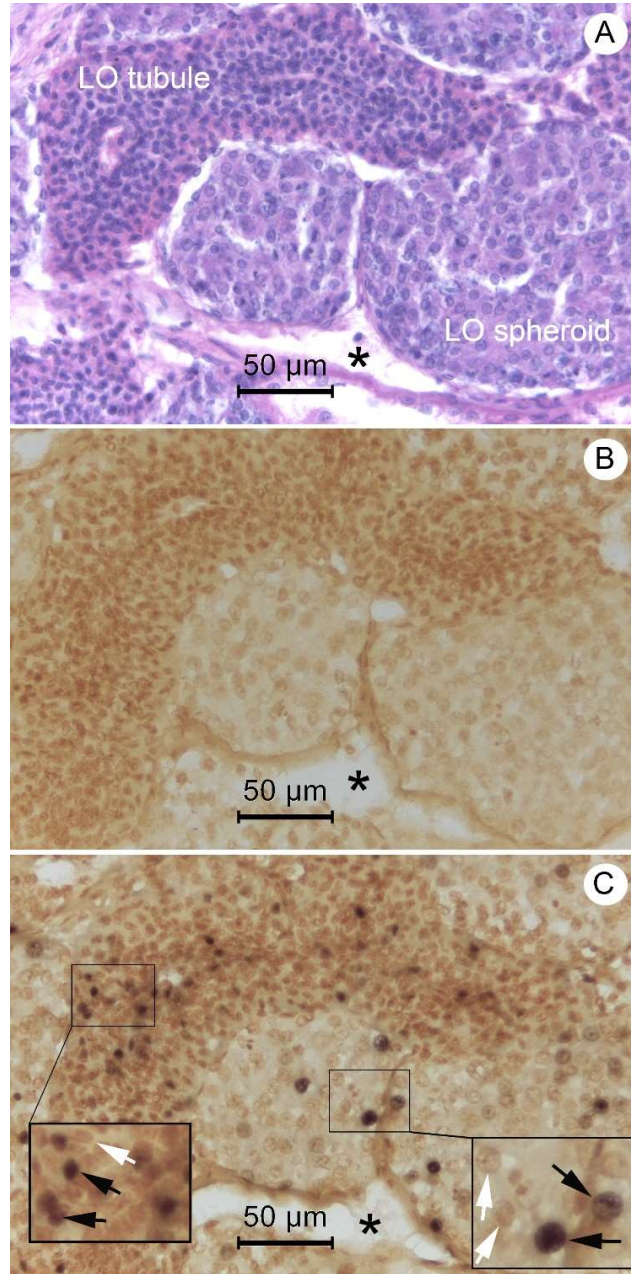

540 with the ATPase method only and 1 positive for DIV1 by PCR with both the ATPase and MCP  
541 methods.

542 An example of the unexpected, positive ISH reactions in many nuclei in both the LO tubule  
543 matrix and in the spheroids are shown in **Fig 10C**. In other samples without spheroids, the  
544 signals were still present in the nuclei of tubule matrix cells. This contrasts curiously with the  
545 situation in DIV1-diseased shrimp where the lesions occur in the LO cell cytoplasm rather than  
546 the nuclei and where they are accompanied by densely basophilic, karyorrhectic and pyknotic  
547 nuclei that give photomicrographs a “peppered” appearance (see the NACA disease card for  
548 DIV1) similar to that seen with lesions of yellow head virus (YHV)(Flegel, 2006).

549

550 An example of the unexpected positive ISH reactions in the nuclei of the tubule epithelial cells  
551 of the HP of the same 4 specimens as above are shown in **Fig. 11C**. Again, the reactions differ  
552 from the situation in DIV1-diseased shrimp where the ISH signals arise in the cytoplasm of  
553 cells in the interstitial spaces (i.e., connective tissue) that separate the HP tubules. A comparison  
554 is shown at high magnification in **Fig. 12**.

555  
556  
557  
558  
559  
560  
561  
562  
563  
564  
565  
566  
567  
568  
569  
570  
571  
572  
573  
574  
575  
576  
577  
578  
579  
580  
581  
582  
583  
584  
585

**Figure 11.**

Example of the curious, positive ISH reactions for DIV1 in the nuclei of tubule epithelial cells of the HP. The asterisks in each photomicrograph indicate the same relative position in the 3 adjacent tissue sections. (A) H&E stained section showing normal HP histology. (B) No-probe negative control showing no ISH signals. (C) Positive ISH signals in the nuclei of HP tubule epithelial cells.

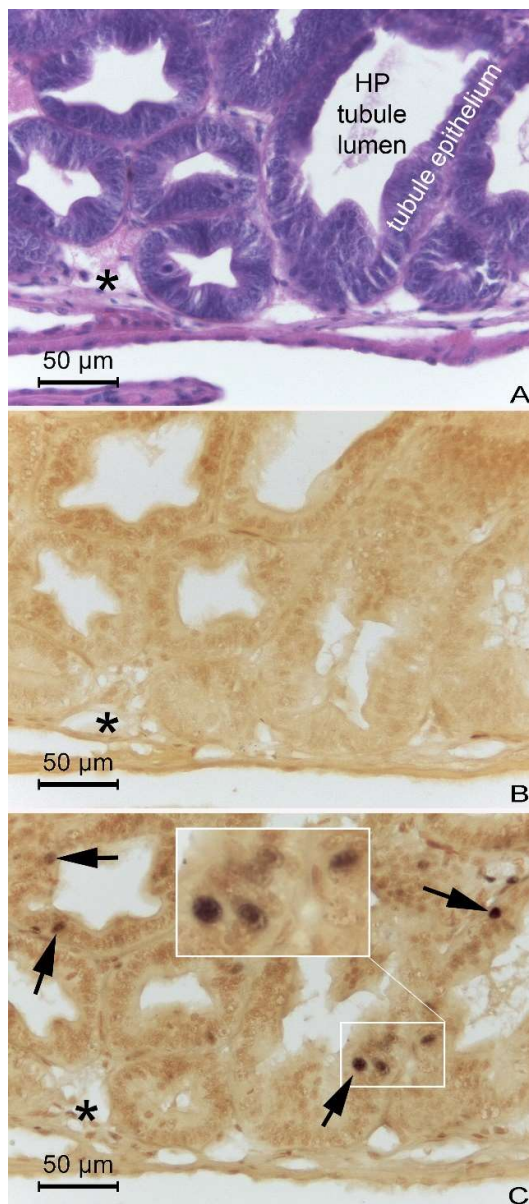

586

587

588

589

590

591 **Figure 12.**

592 Comparison of photomicrographs  
593 showing positive ISH reactions  
594 (arrows) for DIV1 in the HP tissue of  
595 diseased shrimp (A) and non-  
596 diseased shrimp (B), both positive  
597 for DIV1 by PCR using the ATPase  
598 method. In (A) the positive reactions  
599 occur connective tissue in the  
600 interstitial spaces between the HP  
601 tubules while in (B) (copy from Fig.  
602 10C above) they occur in the nuclei  
603 of the tubule epithelial cells.

604

605

606

607

608

609

610

611

612

613

614

615

## 616 **DISCUSSION**

617 We used 2 different PCR methods with each virus targeted in this study. The first method for  
618 each was the standard one used for each of the viruses in our laboratory. The second method  
619 for each virus was not used routinely and was employed in order to further avoid the possibility  
620 of contamination from post-PCR material. In addition, the second method for each virus was  
621 designed to be distant on the respective genomes from the region used in the first tests, reducing  
622 the possibility that amplicons could have arisen from a single incomplete viral segment. The  
623 fact that both tests for each virus were positive for the same shrimp specimens in each batch  
624 and the fact that the sequence identities were 99-100% for all the target sequences made us  
625 confident that the target amplicons did not arise from laboratory contamination. However, we  
626 cannot exclude the possibility that the amplified sequences arose from incomplete viral  
627 genomes or from endogenous viral elements (EVE) such as have been reported, for example,

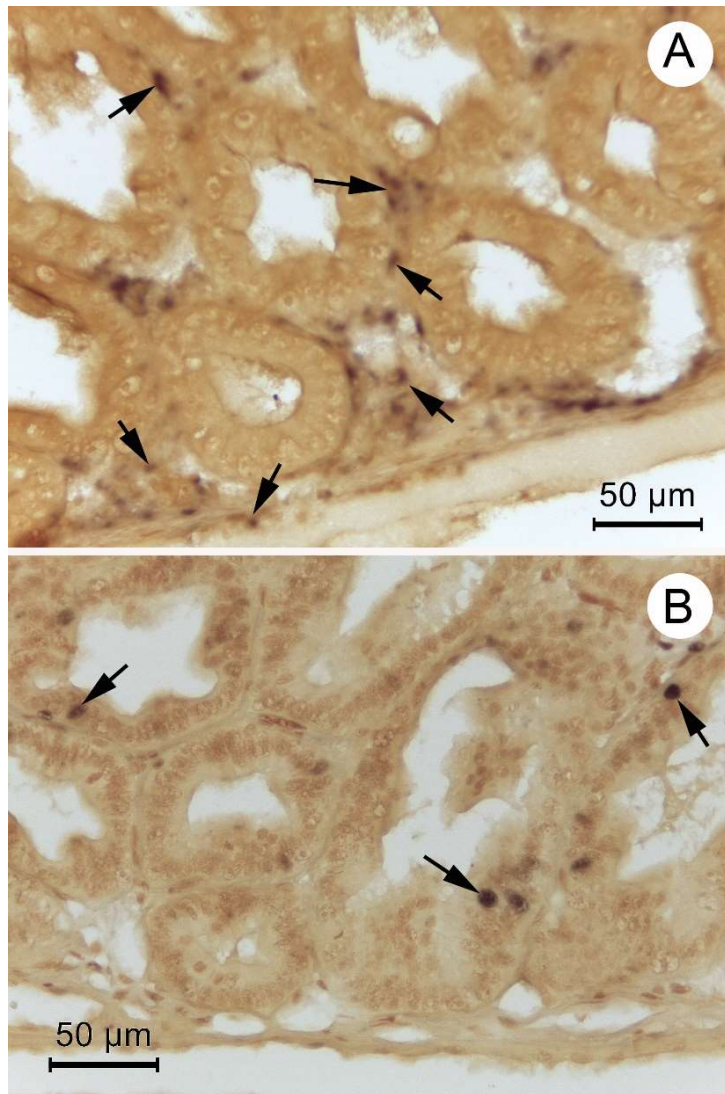

628 for infectious hypodermal and hematopoietic necrosis virus (IHHNV) (Saksmerprom, et al.,  
629 2011; Tang Lightner, 2006) in *P. monodon* and *P. vannamei* and white spot syndrome virus  
630 (WSSV) (Taengchaiyaphum, et al., 2019; Utari, et al., 2017) in *P. monodon*. Thus, full viral  
631 genome sequencing and ultimately bioassays would be required to confirm whether the  
632 captured *P. monodon* would be capable of transmitting IMNV and DIV1.

633

634 The fact that the ISH tests for IMNV were negative weakens the possibility that the specimens  
635 were carrying infectious IMNV. However, grossly normal broodstock specimens of *P.*  
636 *vannamei* infected with IMNV and positive for it by nested-RT-PCR often give negative ISH  
637 test results but remain able to transmit IMNV to naïve shrimp. On the other hand, 6 out of 8  
638 broodstock specimens in sample Lot 4 that were positive for DIV1 but negative for IMNV  
639 using PCR methods showed muscle necrosis similar to those in the specimens positive for  
640 IMNV by RT-PCR, indicating that they arose from some other cause. Despite these  
641 uncertainties, we believe it is better to be cautious and exclude such shrimp as candidates for  
642 PL production.

643

644 With respect to the specimens that gave positive PCR results for DIV1, the histological analysis  
645 also revealed no pathognomonic lesions in the HPT or supporting lesions in the LO. Nor were  
646 there any positive ISH reactions in the HPT, one of its prime target tissues. However, unlike  
647 IMNV, some positive but atypical ISH test results were obtained in one of its prime target  
648 organs (i.e., in the LO) despite the lack of DIV1-type lesions. They were atypical because the  
649 positive signals arose in the nuclei instead of the cytoplasm as is expected for DIV-diseased  
650 shrimp. Even more surprising was the occurrence of positive ISH reactions in nuclei of the  
651 tubule epithelial cells of the HP. This was surprising not only because the positive signals were  
652 from a nucleus but also because positive ISH reactions in the HP of DIV-diseased shrimp occur  
653 only in the connective tissue of the HP (i.e., in the interstitial spaces between the tubules).  
654 Indeed, there were no positive ISH reactions in other connective tissues of these specimens,  
655 even though such reactions are widespread in the connective tissue of DIV-diseased shrimp.

656

657 The atypical ISH reactions for DIV1 in the captured broodstock specimens when compared to  
658 those in DIV-diseased shrimp raise many questions. None of these can be answered without  
659 further research. The most important questions for shrimp farmers are those related to the  
660 possibility of DIV1 disease transmission. For example, it is known that iridoviruses have both  
661 nuclear and cytoplasmic stages in the life cycle and that most of the viral production occurs in  
662 the cytoplasm. This corresponds to the experience in DIV1-diseased shrimp where strong ISH  
663 reactions have been reported in the cytoplasm where masses of virions can be seen by  
664 transmission electron microscopy. However, positive ISH reactions have not been reported in  
665 the nuclei of DIV1-diseased shrimp, so it is possible that the amount of viral DNA in the nuclei  
666 during the disease state is insufficient to give a visible signal with the methods that have been

667 used. Is it possible that the positive ISH reactions seen in our captured specimens indicate the  
668 presence of an inactive stage of DIV1 that has persisted in survivors from a previous exposure?  
669 If so, such hosts might serve as tolerant carriers. Yet another possibility is that the specimens  
670 we examined carried a non-pathogenic, genetic variant of DIV1 that differed from the type  
671 described from China. Again, only complete genome sequencing and bioassays could answer  
672 these questions. It is also possible that *P. monodon* is tolerant to DIV1 and carries it in a latent  
673 state in nuclei of the HP and LO.

674

675 Because of the uncertainties discussed above, we cannot confidently dismiss the possibility  
676 that the grossly normal, PCR-positive, captured *P. monodon* specimens we examined might  
677 have been infected with the respective viruses at the carrier level. If so, they might serve as  
678 potential vehicles for introduction of IMNV and/or DIV1 into crustacean culture systems,  
679 especially if they were used in hatcheries for production of PL for distribution to shrimp  
680 farmers without proper precautions in place. It is already known that *P. monodon* may be  
681 infected with IMNV without showing gross signs of disease (Tang, et al., 2005) and our results  
682 suggest that the long presence of IMNV in Indonesia after its introduction around 2007  
683 (Senapin, et al., 2007) may have resulted in its transfer from shrimp farms to grossly normal  
684 wild stocks of *P. monodon*. If this is so and if infectious IMNV is present in a significant portion  
685 of *P. monodon* in the Indian Ocean, it is possible that the recent outbreak of IMNV at a *P.*  
686 *vannamei* farm in Malaysia in June 2018 (WAHID, OIE) might have occurred via this  
687 transmission pathway.

688

689 Although the presence of IMNV in wild *P. monodon* may be proposed to have arisen because  
690 of its long presence in Indonesia after introduction there around 2006, it is more difficult to  
691 hypothesize the pathway for occurrence of DIV1-positive specimens because the virus was first  
692 described from China less than 4 years ago (Qiu, et al., 2017; Xu, et al., 2016). If DIV1 is a newly  
693 emerging pathogen from China it seems unlikely that it could have spread to the Indian Ocean  
694 and reached a significant presence in the wild *P. monodon* population there within 3 years  
695 simply by movement of wild, infected shrimp. It also seems unlikely that DIV1 could have been  
696 endemic in *P. monodon* but been overlooked or not have caused any mortality in exotic *P.*  
697 *vannamei* since it became the dominant cultivated species from the early 2000's onward. This  
698 is especially so when one considers that *P. vannamei* went through several years of cultivation  
699 near and together with *P. monodon* without DIV1 disease outbreaks before and even after *P.*  
700 *vannamei* grew to dominance.

701

702 In summary, because we did not amplify and sequence the whole viral genome from the  
703 specimens, and because we did not do bioassays, we cannot confirm that the shrimp were  
704 carriers of infectious IMNV or DIV1. However, we believe that our PCR results justify a  
705 precautionary warning regarding the possibility of introducing IMNV and DIV1 into

706 aquaculture facilities via use of wild, captured *P. monodon* from the Indian Ocean. To avoid  
707 this possibility, we recommend that wild, captured *P. monodon* from the Indian Ocean intended  
708 for use as broodstock be subjected to PCR testing for DIV1 and IMNV before use in a hatchery  
709 and that they be discarded, if they are found to be positive. If not positive, their larvae and post-  
710 larvae (PL) should be monitored for presence of these 2 viruses periodically during production  
711 and again before they are sold to users. We also strongly recommend that industry practitioners  
712 who currently use wild, captured *P. monodon* be discouraged from handling them together with  
713 broodstock of other crustaceans listed above in common maturation or hatchery facilities. In  
714 addition, we recommend that shrimp farmers be discouraged from cultivating those species  
715 together with *P. monodon* in the same pond or on the same farm, especially if the latter  
716 originated from wild, captured broodstock that have not been tested for freedom from IMNV  
717 and/or DIV1, as applicable based on susceptibility of the specific species. Indeed, since  
718 domesticated stocks of *P. monodon* SPF for IMNV and DIV1 are available, we do not  
719 recommend the use of captured wild *P. monodon* broodstock for PL production at all. One  
720 reason is to prevent not only transmission of these two viruses, but also monodon baculovirus  
721 (MBV), hepatopancreatic parvovirus (HPV), white spot syndrome virus (WSSV) and yellow  
722 head virus (YHV). In addition, reducing the fishing pressure on shrimp broodstock should help  
723 to promote a more sustainable natural shrimp fishery.

724

725 **Acknowledgement:** We would like to thank the financial support from the Newton prize  
726 (Chairman's award) 2017 and the Royal Society International Collaboration Awards 2019, the  
727 Global Challenges Research Fund (GCRF) to Prof. Grant D. Stentiford, Cefas/UK and Dr.  
728 Kallaya Sritunyalucksana, BIOTEC, NSTDA/Thailand.

729

730 **Conflict of interests:** none

731

### 732 **References**

- 733 Anonymous, 2017. Manual of diagnostic tests for aquatic animals, 5th ed. World Organization  
734 for Animal Health (OIE), [http://www.oie.int/international-standard-setting/aquatic-](http://www.oie.int/international-standard-setting/aquatic-manual/access-online/)  
735 [manual/access-online/](http://www.oie.int/international-standard-setting/aquatic-manual/access-online/).
- 736 Bell, T.A., Lightner, D.V., 1988. A handbook of normal shrimp histology. World Aquaculture  
737 Society, Baton Rouge, LA.
- 738 Chen, X., Qiu, L., Wang, H., Zou, P., Dong, X., Li, F., Huang, J., 2019. Susceptibility of  
739 *Exopalaemon carinicauda* to the infection with shrimp hemocyte iridescent virus  
740 (SHIV 20141215), a strain of Decapod iridescent virus 1 (DIV1). *Viruses*. 11, 387.
- 741 Flegel, T.W., 2006. Detection of major penaeid shrimp viruses in Asia, a historical perspective  
742 with emphasis on Thailand. *Aquaculture*. 258, 1-33.



- 743 Li, F., Xu, L., Yang, F., 2017. Genomic characterization of a novel iridovirus from redclaw  
744 crayfish *Cherax quadricarinatus*: evidence for a new genus within the family  
745 *Iridoviridae*. J. Gen. Virol. 98, 2589-2595.
- 746 Lightner, D.V., 1988. Diseases of cultured penaeid shrimp and prawns. in: Sinderman, C.J.,  
747 Lightner, D.V. (Eds.), Disease diagnosis and control in North American marine  
748 aquaculture. Elsevier, Amsterdam, pp. 8-127.
- 749 Poulos, B.T., Lightner, D.V., 2006. Detection of infectious myonecrosis virus (IMNV) of penaeid  
750 shrimp by reverse-transcriptase polymerase chain reaction (RT-PCR). Dis. Aquat. Organ.  
751 73, 69-72.
- 752 Poulos, B.T., Tang, K.F.J., Pantoja, C.R., Bonami, J.R., Lightner, D.V., 2006. Purification and  
753 characterization of infectious myonecrosis virus of penaeid shrimp. J Gen. Virol. 87,  
754 987-996.
- 755 Qiu, L., Chen, M.-M., Wan, X.-Y., Li, C., Zhang, Q.-L., Wang, R.-Y., Cheng, D.-Y., Dong, X.,  
756 Yang, B., Wang, X.-H., 2017. Characterization of a new member of *Iridoviridae*, Shrimp  
757 hemocyte iridescent virus (SHIV), found in white leg shrimp (*Litopenaeus vannamei*).  
758 Sci. Rep. 7.
- 759 Qiu, L., Chen, M.-M., Wang, R.-Y., Wan, X.-Y., Li, C., Zhang, Q.-L., Dong, X., Yang, B., Xiang,  
760 J.-H., Huang, J., 2018. Complete genome sequence of shrimp hemocyte iridescent virus  
761 (SHIV) isolated from white leg shrimp, *Litopenaeus vannamei*. Arch. Virol. 163, 781-  
762 785.
- 763 Sahul Hameed, A., Abdul Majeed, S., Vimal, S., Madan, N., Rajkumar, T., Santhoshkumar, S.,  
764 Sivakumar, S., 2017. Studies on the occurrence of infectious myonecrosis virus in  
765 pond-reared *Litopenaeus vannamei* (Boone, 1931) in India. J. Fish Dis. 40, 1823-1830.
- 766 Sahul Hameed, A.S., Yoganandhan, K., Sri Widada, J., Bonami, J.R., 2004. Studies on the  
767 occurrence of *Macrobrachium rosenbergii* nodavirus and extra small virus-like  
768 particles associated with white tail disease of *M. rosenbergii* in India by RT-PCR  
769 detection. Aquaculture. 238, 127-133.
- 770 Saksmerprom, V., Jitrakorn, S., Chayaburakul, K., Laiphrom, S., Boonsua, K., Flegel, T.W.,  
771 2011. Additional random, single to multiple genome fragments of *Penaeus stylirostris*  
772 densovirus in the giant tiger shrimp genome have implications for viral disease  
773 diagnosis. Virus Res. 160, 180-190.
- 774 Senapin, S., Phewsaiya, K., Briggs, M., Flegel, T.W., 2007. Outbreaks of infectious myonecrosis  
775 virus (IMNV) in Indonesia confirmed by genome sequencing and use of an alternative  
776 RT-PCR detection method. Aquaculture. 266, 32-38.
- 777 Senapin, S., Phiwsaiya, K., Gangnonngiw, W., Flegel, T.W., 2011. False rumours of disease  
778 outbreaks caused by infectious myonecrosis virus (IMNV) in the whiteleg shrimp in  
779 Asia. J Neg. Results BioMed. 10, 10.

- 780 Sri Widada, j., Durand, S., Cambournac, I., Qian, D., Shi, Z., Dejonghe, E., Richard, V., Bonami,  
781 J.R., 2003. Genome-based detection methods of *Macrobrachium rosenbergii* nodavirus,  
782 a pathogen of the giant freshwater prawn, *Macrobrachium rosenbergii*: dot-blot, in situ  
783 hybridization and RT-PCR. J. Fish Dis. 26, 583-590.
- 784 Taengchaiyaphum, S., Srisala, J., Bunphimpapha, P., Supungul, P., Tassanakajon, A.,  
785 Chaiyapechara, S., Bowornpinyo, S., Sritunyalucksana, K., Flegel, T.W., 2019.  
786 Mendelian inheritance of endogenous viral elements (EVE) of white spot syndrome  
787 virus (WSSV) in shrimp. Dev. Comp. Immunol. 96, 144-149.
- 788 Tang, K.F.J., Lightner, D.V., 2006. Infectious hypodermal and hematopoietic necrosis virus  
789 (IHHNV)-related sequences in the genome of the black tiger prawn *Penaeus monodon*  
790 from Africa and Australia. Virus Res. 118, 185-191.
- 791 Tang, K.F.J., Pantoja, C.R., Redman, R.M., Lightner, D.V., 2007. Development of in situ  
792 hybridization and RT-PCR assay for the detection of a nodavirus (*PvNV*) that causes  
793 muscle necrosis in *Penaeus vannamei*. Dis. Aquat. Organ. 75, 183-190.
- 794 Tang, K.F.J., Pantoja, C.R., Poulos, B.T., Redman, R.M., Lightner, D.V., 2005. *In situ*  
795 hybridization demonstrates that *Litopenaeus vannamei*, *L. stylirostris* and *Penaeus*  
796 *monodon* are susceptible to experimental infection with infectious myonecrosis virus  
797 (IMNV). Dis Aquat Org 63, 261-265.
- 798 Tang, K.F.J., Pantoja, C.R., Redman, R.M., Navarro, S.A., Lightner, D.V., 2011. Ultrastructural  
799 and sequence characterization of *Penaeus vannamei* nodavirus (*PvNV*) from Belize. Dis.  
800 Aquat. Organ. 94, 179-187.
- 801 Utari, H.B., Soowannayan, C., Flegel, T.W., Whityachumnarnkul, B., Kruatrachue, M., 2017.  
802 Variable RNA expression from recently acquired, endogenous viral elements (EVE) of  
803 white spot syndrome virus (WSSV) in shrimp. Dev. Comp. Immunol. 76, 370-379.
- 804 Xu, L., Wang, T., Li, F., Yang, F., 2016. Isolation and preliminary characterization of a new  
805 pathogenic iridovirus from redclaw crayfish *Cherax quadricarinatus*. Dis. Aquat. Organ.  
806 120, 17-26.

807
